# Supplementary material
Source: Springer Nature journal article supplement (https://www.springermedizin.de/resource/supplementary/12883_2011_503_MOESM2_ESM.pdf/9455584)

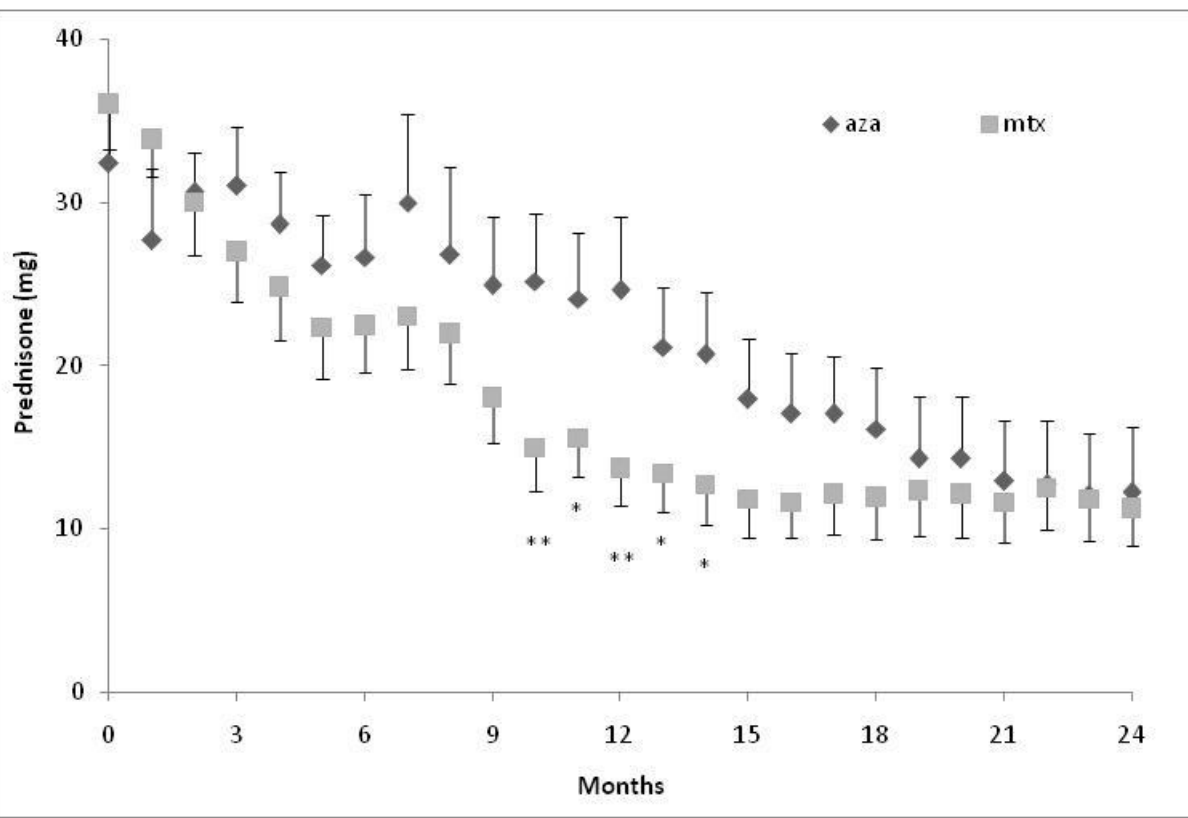

Supplement: MOESM2 [file 9455584]
